# Supplementary material
Source: publisher site journal article supplement (https://www.spandidos-publications.com/1837/downloadSupplementary)
Supplement: Supplementary file 1 [file downloadSupplementary]

Figure S1. Representative intensity of SREBP2 was detected in four matched tumors and adjacent normal tissues using western blotting. SREBP1, sterol regulatory element-binding protein 1; mSREBP1, mature sterol regulatory element-binding protein 1; N, normal tissue; T, tumor.

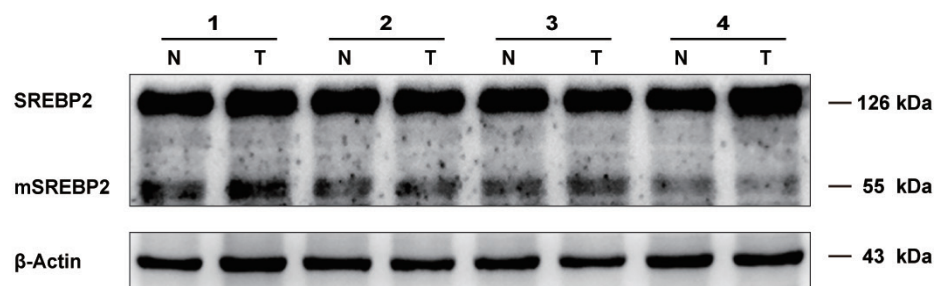

Figure S2. Effects of different shRNA-SREBP1 in ECA-109 cells were detected using western blotting. According to these results, sh1 was selected for the follow-up experiments. mSREBP1, mature sterol regulatory element-binding protein 1; sh, short hairpin; SREBP1, sterol regulatory element-binding protein 1.

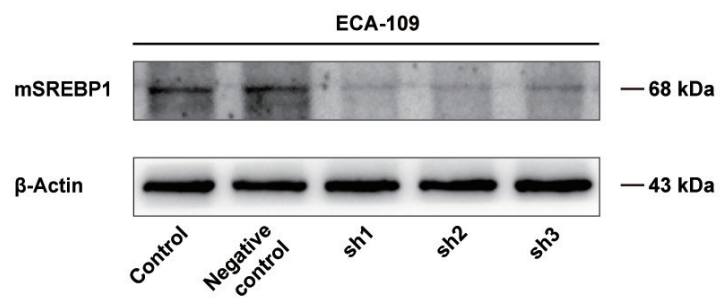

Figure S3. Representative morphological images of ECA-109 and KYSE-150 cells before and after silencing or overexpressing SREBP1 for 48 h. Magnification, x200. SREBP1, sterol regulatory element-binding protein 1; sh, short hairpin.

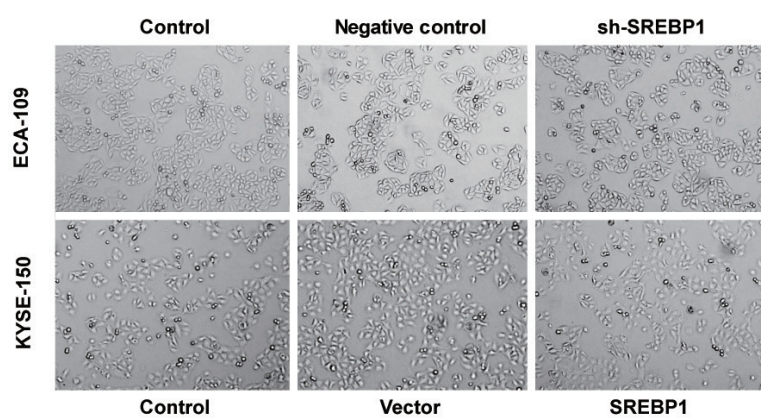

Figure S4. Effects of SREBP1-depletion and SREBP1-overexpression on the protein expression levels of c-Myc, c-Jun, MMP7 and Met were determined using western blotting in ECA-109 and KYSE-150 cells. SREBP1, sterol regulatory element-binding protein 1; si, small interfering; MMP, matrix metalloproteinase.

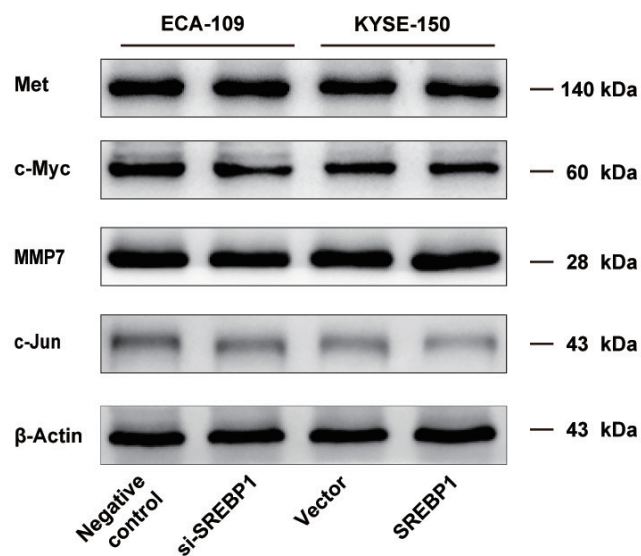

**KYSE-150**

|                | Cytoplasm |        |        |        | Nucleus |        |        |        |          |
|----------------|-----------|--------|--------|--------|---------|--------|--------|--------|----------|
| Mevastatin(μM) | -         | -      | +      | +      | -       | -      | +      | +      |          |
| mSREBP1        |           |        |        |        |         |        |        |        | — 68 kDa |
| SCD1           |           |        |        |        |         |        |        |        | — 42 kDa |
| β-Catenin      |           |        |        |        |         |        |        |        | — 92 kDa |
| β-Actin        |           |        |        |        |         |        |        |        |          |
|                | Vector    | SREBP1 | Vector | SREBP1 | Vector  | SREBP1 | Vector | SREBP1 | Lamin B1 |
